# Supplementary material for: Relative effectiveness of bivalent boosters against severe COVID-19 outcomes among people aged ≥ 65 years in Finland, September 2022 to August 2023
Source: PubMed Central journal article supplement (PMC11395282; doi:10.2807/1560-7917.es.2024.29.37.2300587), 2024-09-12
Supplement: Supplementary_Materials_2300587.pdf [file Supplementary_Materials_2300587.pdf]

## Supplementary Information

### **Relative effectiveness of bivalent boosters against severe COVID-19 outcomes among people aged $\geq 65$ years in Finland, September 2022 to August 2023**

|                                                                                                         |    |
|---------------------------------------------------------------------------------------------------------|----|
| Supplementary Table S1: Enrollment of the study cohort . . . . .                                        | 2  |
| Supplementary Table S2: Severely immunocompromising conditions . . . . .                                | 3  |
| Supplementary Table S3: Highly predisposing comorbidities or medical therapies . . . . .                | 4  |
| Supplementary Table S4: Moderately predisposing comorbidities or medical therapies . . . . .            | 5  |
| Supplementary Table S5: Hazard ratios, 65-to-110-year-olds . . . . .                                    | 6  |
| Supplementary Table S6: Hazard ratios, 65-to-110-year-olds, stratified by vaccine composition . . . . . | 8  |
| Supplementary Table S7: Hazard ratios, 65-to-79-year-olds . . . . .                                     | 11 |
| Supplementary Table S8: Hazard ratios, 80-to-110-year-olds . . . . .                                    | 13 |
| Supplementary Figure S1: Distribution of sequenced Omicron lineages in Finland . . . . .                | 15 |
| Supplementary Figure S2: Distribution of deaths due to COVID-19 in Finland . . . . .                    | 16 |

This supplementary material is hosted by Eurosurveillance as supporting information alongside the article "*Relative effectiveness of bivalent boosters against severe COVID-19 outcomes among people aged  $\geq 65$  years in Finland, September 2022 to August 2023*", on behalf of the authors, who remain responsible for the accuracy and appropriateness of the content. The same standards for ethics, copyright, attributions and permissions as for the article apply. Supplements are not edited by Eurosurveillance and the journal is not responsible for the maintenance of any links or email addresses provided therein.

**Supplementary Table S1: Enrollment of the study cohort** The target population included all individuals aged 65 years or more at the beginning of the study who were living in Finland during the study and had received at least two monovalent COVID-19 vaccine doses prior to the study.

|                                                                                    | No. of individuals |
|------------------------------------------------------------------------------------|--------------------|
| Target population                                                                  | 1216945            |
| Excluded due to hospitalisation due to COVID-19 at the beginning of the study      | 459                |
| Excluded due to too short dosing interval* prior to the study                      | 8616               |
| Excluded due to bivalent booster prior to the study                                | 27                 |
| Excluded due to right-censoring event prior to the start of individual follow-up** | 15972              |
| Study cohort                                                                       | 1191871            |

\* less than 91 days between two doses or

less than 14 days between the first two doses (42 days if the first vaccination was with Vaxzevria)

\*\* The individual follow-up period started earliest on 1 September 2022 and at least 90 days after the last monovalent COVID-19 vaccination or laboratory-confirmed SARS-CoV-2 infection prior to the study. If there was another COVID-19 vaccination or laboratory-confirmed SARS-CoV-2 infection or the individual died after the start of the study but within those 90 days, the individual was excluded.

**Supplementary Table S2: Severely immunocompromising conditions** Definition of comorbidities that were considered severely immunocompromising conditions.

| Classification system                       | Codes                                                                                                                                                                                                                                                                                                                                                                                                                                                                                                          |
|---------------------------------------------|----------------------------------------------------------------------------------------------------------------------------------------------------------------------------------------------------------------------------------------------------------------------------------------------------------------------------------------------------------------------------------------------------------------------------------------------------------------------------------------------------------------|
| <b>Actively treated cancer</b>              |                                                                                                                                                                                                                                                                                                                                                                                                                                                                                                                |
| ICD10                                       | C00, C01, C02, C03, C04, C05, C06, C07, C08, C09, C10, C11, C12, C13, C14, C15, C16, C17, C18, C19, C20, C21, C22, C23, C24, C25, C26, C27, C28, C29, C30, C31, C32, C33, C34, C35, C36, C37, C38, C39, C40, C41, C42, C43, C45, C46, C47, C48, C49, C50, C51, C52, C53, C54, C55, C56, C57, C58, C59, C60, C61, C62, C63, C64, C65, C66, C67, C68, C69, C70, C71, C72, C73, C74, C75, C76, C77, C78, C79, C80, C81, C82, C83, C84, C85, C86, C87, C88, C89, C90, C91, C92, C93, C94, C95, C96, C97, D051, D39 |
| <b>Organ or stem cell transplantation</b>   |                                                                                                                                                                                                                                                                                                                                                                                                                                                                                                                |
| ICD10                                       | T86, Z94                                                                                                                                                                                                                                                                                                                                                                                                                                                                                                       |
| <b>Severe disorder of the immune system</b> |                                                                                                                                                                                                                                                                                                                                                                                                                                                                                                                |
| ICD10                                       | D7081, D7089, D80, D81, D82, D83, D84, E3100, E723, E76, E791, E792, E798, E799, Q7782, Q7800, Q7808, Q809, Q8900, Q8933, Q8934, Q938, Z908                                                                                                                                                                                                                                                                                                                                                                    |
| NCSP                                        | JMA                                                                                                                                                                                                                                                                                                                                                                                                                                                                                                            |

ICD10, International Statistical Classification of Diseases, tenth revision;

NCSP, Nordic Classification of Surgical Procedures

**Supplementary Table S3: Highly predisposing comorbidities or medical therapies** Definition of comorbidities and medical therapies that were considered highly predisposing to severe COVID-19.

| Classification system                     | Codes                                                                                  |
|-------------------------------------------|----------------------------------------------------------------------------------------|
| <b>Down syndrome</b>                      |                                                                                        |
| ICD10                                     | Q90                                                                                    |
| <b>Severe chronic respiratory disease</b> |                                                                                        |
| ICD10                                     | E84, J41, J42, J43, J44, J45, J46, J47, Z902                                           |
| ICPC2                                     | R96                                                                                    |
| <b>Severe kidney disease</b>              |                                                                                        |
| ICD10                                     | E102, E112, E142, I12, I13, N00, N01, N02, N03, N04, N05, N07, N08, N11, N14, N18, N19 |
| <b>Type 2 diabetes mellitus</b>           |                                                                                        |
| ATC                                       | A10B                                                                                   |
| ICD10                                     | E11, E13, E14                                                                          |
| ICPC2                                     | T90                                                                                    |

ATC, Anatomical Therapeutic Chemical Classification System;  
 ICD10, International Statistical Classification of Diseases, tenth revision;  
 ICPC2, International Classification of Primary Care, second edition

**Supplementary Table S4: Moderately predisposing comorbidities or medical therapies** Definition of comorbidities and medical therapies that were considered moderately predisposing to severe COVID-19.

| Classification system                                    | Codes                                                                                                                                                                                   |
|----------------------------------------------------------|-----------------------------------------------------------------------------------------------------------------------------------------------------------------------------------------|
| <b>Autoimmune disease</b>                                |                                                                                                                                                                                         |
| ICD10                                                    | D86, K50, K51, L40, M02, M05, M06, M07, M139, M45, M460, M461, M469, M941                                                                                                               |
| <b>Immunosuppressive medication</b>                      |                                                                                                                                                                                         |
| ATC                                                      | H02AB02, H02AB04, H02AB06, H02AB07, L01BA01, L01XC02, L04AA06, L04AA10, L04AA13, L04AA18, L04AA24, L04AA26, L04AA29, L04AA33, L04AA37, L04AB, L04AC, L04AD01, L04AD02, L04AX01, L04AX03 |
| <b>Neurological condition affecting breathing</b>        |                                                                                                                                                                                         |
| ICD10                                                    | G20, G21, G22, G23, G24, G25, G26, G70, G71, G72, G73, G80, G81, G82, G83, I60, I61, I62, I63, I64, I65, I66, I67, I68, I69                                                             |
| <b>Psychotic disease</b>                                 |                                                                                                                                                                                         |
| ATC                                                      | N05AH02                                                                                                                                                                                 |
| ICD10                                                    | F20, F21, F22, F23, F24, F25, F26, F27, F28, F29                                                                                                                                        |
| ICPC2                                                    | P72                                                                                                                                                                                     |
| <b>Severe chronic liver disease</b>                      |                                                                                                                                                                                         |
| ICD10                                                    | K702, K703, K704, K71, K72, K73, K74                                                                                                                                                    |
| <b>Severe heart disease</b>                              |                                                                                                                                                                                         |
| ICD10                                                    | I110, I119, I12, I130, I131, I132, I139, I15, I20, I21, I22, I23, I24, I25, I26, I27, I28, I418, I42, I43, I50                                                                          |
| <b>Sleep apnea</b>                                       |                                                                                                                                                                                         |
| ICD10                                                    | G473                                                                                                                                                                                    |
| NCSP                                                     | WX723, WX780                                                                                                                                                                            |
| <b>Type 1 diabetes mellitus or adrenal insufficiency</b> |                                                                                                                                                                                         |
| ATC                                                      | A10A                                                                                                                                                                                    |
| ICD10                                                    | E10, E250, E271, E272, E274, E3100, E3101, E3108, E896                                                                                                                                  |
| ICPC2                                                    | T89                                                                                                                                                                                     |

ATC, Anatomical Therapeutic Chemical Classification System;  
 ICD10, International Statistical Classification of Diseases, tenth revision;  
 ICPC2, International Classification of Primary Care, second edition;  
 NCSP, Nordic Classification of Surgical Procedures

**Supplementary Table S5: Hazard ratios, 65-to-110-year-olds** Covariate-adjusted hazard ratios comparing the hazards of severe COVID-19 outcomes and a negative control outcome in 65-to-110-year-olds who received a bivalent booster with the corresponding hazards in those who did not receive a bivalent booster.

| Days since bivalent booster                              | Cases | Person-years | Hazard ratio |      |      |
|----------------------------------------------------------|-------|--------------|--------------|------|------|
|                                                          |       |              | MLE          | LCI  | UCI  |
| <u>September 2022 – February 2023</u>                    |       |              |              |      |      |
| <b>Hospitalisation due to COVID-19</b>                   |       |              |              |      |      |
| No bivalent booster                                      | 1599  | 298530       |              |      |      |
| 0–2                                                      | 5     | 5287         | 0.15         | 0.06 | 0.36 |
| 3–8                                                      | 37    | 10556        |              |      |      |
| 9–13                                                     | 27    | 8771         |              |      |      |
| 14–60                                                    | 186   | 79477        | 0.45         | 0.37 | 0.55 |
| 61–120                                                   | 91    | 67702        | 0.70         | 0.54 | 0.92 |
| 121–180                                                  | 6     | 3109         | 1.41         | 0.56 | 3.55 |
| <b>Death due to COVID-19</b>                             |       |              |              |      |      |
| No bivalent booster                                      | 974   | 298767       |              |      |      |
| 0–2                                                      | 0     | 5287         | NE           | NE   | NE   |
| 3–8                                                      | 1–4   | 10557        |              |      |      |
| 9–13                                                     | 11    | 8772         |              |      |      |
| 14–60                                                    | 109   | 79499        | 0.49         | 0.38 | 0.62 |
| 61–120                                                   | 58    | 67725        | 0.71         | 0.52 | 0.98 |
| 121–180                                                  | 1–4   | 3110         | 0.41         | 0.06 | 3.05 |
| <b>Death in which COVID-19 was a contributing factor</b> |       |              |              |      |      |
| No bivalent booster                                      | 812   | 298767       |              |      |      |
| 0–2                                                      | 1–4   | 5287         | 0.13         | 0.03 | 0.52 |
| 3–8                                                      | 1–4   | 10557        |              |      |      |
| 9–13                                                     | 4     | 8772         |              |      |      |
| 14–60                                                    | 99    | 79499        | 0.40         | 0.31 | 0.51 |
| 61–120                                                   | 57    | 67725        | 0.56         | 0.41 | 0.78 |
| 121–180                                                  | 2     | 3110         | 0.71         | 0.17 | 2.98 |
| <b>Emergency room visit due to injury</b>                |       |              |              |      |      |
| No bivalent booster                                      | 10078 | 296697       |              |      |      |
| 0–2                                                      | 100   | 5257         | 0.59         | 0.48 | 0.72 |
| 3–8                                                      | 329   | 10493        |              |      |      |
| 9–13                                                     | 259   | 8715         |              |      |      |
| 14–60                                                    | 2434  | 78846        | 0.92         | 0.87 | 0.98 |
| 61–120                                                   | 2105  | 66981        | 0.92         | 0.86 | 0.98 |
| 121–180                                                  | 101   | 3072         | 1.08         | 0.87 | 1.32 |
| <u>March – August 2023</u>                               |       |              |              |      |      |
| <b>Hospitalisation due to COVID-19</b>                   |       |              |              |      |      |
| No bivalent booster                                      | 468   | 208496       |              |      |      |
| 0–2                                                      | 0     | 67           | NE           | NE   | NE   |
| 3–8                                                      | 0     | 151          |              |      |      |
| 9–13                                                     | 0     | 149          |              |      |      |
| 14–60                                                    | 6–9   | 4098         | 0.67         | 0.33 | 1.36 |
| 61–120                                                   | 61    | 37642        | 0.53         | 0.39 | 0.71 |
| 121–180                                                  | 391   | 100232       | 0.88         | 0.74 | 1.05 |
| 181–240                                                  | 210   | 98988        | 0.89         | 0.73 | 1.10 |
| 241–300                                                  | 54    | 69818        | 1.03         | 0.70 | 1.50 |

(Supplementary Table S5 continued)

| Days since bivalent booster                              | Cases | Person-years | MLE  | LCI  | UCI   |
|----------------------------------------------------------|-------|--------------|------|------|-------|
| 301–364                                                  | 1–4   | 4252         | 0.77 | 0.18 | 3.26  |
| <b>Death due to COVID-19</b>                             |       |              |      |      |       |
| No bivalent booster                                      | 170   | 208570       |      |      |       |
| 0–2                                                      | 0     | 67           | NE   | NE   | NE    |
| 3–8                                                      | 0     | 151          |      |      |       |
| 9–13                                                     | 0     | 149          |      |      |       |
| 14–60                                                    | 1–4   | 4099         | 0.70 | 0.22 | 2.22  |
| 61–120                                                   | 17    | 37649        | 0.41 | 0.24 | 0.70  |
| 121–180                                                  | 136   | 100270       | 0.80 | 0.60 | 1.06  |
| 181–240                                                  | 106   | 99038        | 0.90 | 0.66 | 1.22  |
| 241–300                                                  | 33    | 69833        | 1.28 | 0.77 | 2.13  |
| 301–364                                                  | 1–4   | 4253         | 1.46 | 0.41 | 5.18  |
| <b>Death in which COVID-19 was a contributing factor</b> |       |              |      |      |       |
| No bivalent booster                                      | 123   | 208570       |      |      |       |
| 0–2                                                      | 0     | 67           | NE   | NE   | NE    |
| 3–8                                                      | 0     | 151          |      |      |       |
| 9–13                                                     | 0     | 149          |      |      |       |
| 14–60                                                    | 1–4   | 4099         | 1.16 | 0.36 | 3.72  |
| 61–120                                                   | 9     | 37649        | 0.38 | 0.18 | 0.78  |
| 121–180                                                  | 108   | 100270       | 1.02 | 0.73 | 1.41  |
| 181–240                                                  | 66    | 99038        | 0.75 | 0.52 | 1.08  |
| 241–300                                                  | 23    | 69833        | 1.20 | 0.67 | 2.14  |
| 301–364                                                  | 1–4   | 4253         | 2.00 | 0.25 | 16.05 |
| <b>Emergency room visit due to injury</b>                |       |              |      |      |       |
| No bivalent booster                                      | 6060  | 204335       |      |      |       |
| 0–2                                                      | 1–4   | 66           | 0.47 | 0.07 | 3.37  |
| 3–8                                                      | 5     | 149          |      |      |       |
| 9–13                                                     | 1–4   | 146          |      |      |       |
| 14–60                                                    | 114   | 4031         | 0.94 | 0.78 | 1.13  |
| 61–120                                                   | 1219  | 37042        | 1.03 | 0.96 | 1.11  |
| 121–180                                                  | 3074  | 98513        | 0.96 | 0.91 | 1.02  |
| 181–240                                                  | 2950  | 96917        | 0.96 | 0.91 | 1.02  |
| 241–300                                                  | 1990  | 68141        | 0.96 | 0.90 | 1.03  |
| 301–364                                                  | 118   | 4144         | 1.00 | 0.82 | 1.21  |

MLE, maximum likelihood estimate;

LCI/UCI, lower/upper limit of the 95% Wald confidence interval;

NE, not estimated

Case counts between 1 and 4 are reported as 1–4 and if necessary (due to the presentation of totals in the main text) also bigger counts are masked to not disclose any count between 1 and 4.

**Supplementary Table S6: Hazard ratios, 65-to-110-year-olds, stratified by vaccine composition**  
Covariate-adjusted hazard ratios comparing the hazards of severe COVID-19 outcomes in 65-to-110-year-olds who received a bivalent booster with the corresponding hazards in those who did not receive a bivalent booster distinguishing between BA.1 and BA.4-5 bivalent COVID-19 vaccines.

| Days since bivalent booster                              | Cases | Person-years | Hazard ratio |      |      |
|----------------------------------------------------------|-------|--------------|--------------|------|------|
|                                                          |       |              | MLE          | LCI  | UCI  |
| <u>September 2022 – February 2023</u>                    |       |              |              |      |      |
| <b>Hospitalisation due to COVID-19</b>                   |       |              |              |      |      |
| No bivalent booster                                      | 1599  | 299128       |              |      |      |
| <i>BA.1 bivalent booster</i>                             |       |              |              |      |      |
| 0–13                                                     | 19    | 7516         | 0.37         | 0.23 | 0.60 |
| 14–60                                                    | 53    | 24634        | 0.38         | 0.28 | 0.52 |
| 61–120                                                   | 36    | 21732        | 0.78         | 0.54 | 1.12 |
| 121–180                                                  | 1–4   | 1649         | 1.99         | 0.72 | 5.49 |
| <i>BA.4-5 bivalent booster</i>                           |       |              |              |      |      |
| 0–13                                                     | 50    | 17109        | 0.49         | 0.36 | 0.67 |
| 14–60                                                    | 132   | 54876        | 0.50         | 0.40 | 0.62 |
| 61–120                                                   | 52    | 45973        | 0.68         | 0.49 | 0.94 |
| 121–180                                                  | 1–4   | 1441         | 0.66         | 0.09 | 4.83 |
| <b>Death due to COVID-19</b>                             |       |              |              |      |      |
| No bivalent booster                                      | 973   | 299365       |              |      |      |
| <i>BA.1 bivalent booster</i>                             |       |              |              |      |      |
| 0–13                                                     | ND    | 7517         | 0.17         | 0.06 | 0.46 |
| 14–60                                                    | 26    | 24640        | 0.38         | 0.25 | 0.57 |
| 61–120                                                   | 24    | 21739        | 0.94         | 0.60 | 1.46 |
| 121–180                                                  | 0     | 1650         | NE           | NE   | NE   |
| <i>BA.4-5 bivalent booster</i>                           |       |              |              |      |      |
| 0–13                                                     | ND    | 17110        | 0.20         | 0.11 | 0.37 |
| 14–60                                                    | 83    | 54891        | 0.55         | 0.42 | 0.71 |
| 61–120                                                   | 34    | 45988        | 0.62         | 0.42 | 0.92 |
| 121–180                                                  | ND    | 1442         | 0.76         | 0.10 | 5.72 |
| <b>Death in which COVID-19 was a contributing factor</b> |       |              |              |      |      |
| No bivalent booster                                      | 814   | 299365       |              |      |      |
| <i>BA.1 bivalent booster</i>                             |       |              |              |      |      |
| 0–13                                                     | ND    | 7517         | 0.23         | 0.09 | 0.56 |
| 14–60                                                    | 30    | 24640        | 0.42         | 0.29 | 0.63 |
| 61–120                                                   | 20    | 21739        | 0.68         | 0.42 | 1.10 |
| 121–180                                                  | ND    | 1650         | 1.65         | 0.40 | 6.84 |
| <i>BA.4-5 bivalent booster</i>                           |       |              |              |      |      |
| 0–13                                                     | ND    | 17110        | 0.06         | 0.02 | 0.17 |
| 14–60                                                    | 68    | 54891        | 0.40         | 0.30 | 0.53 |
| 61–120                                                   | 36    | 45988        | 0.53         | 0.36 | 0.77 |
| 121–180                                                  | 0     | 1442         | NE           | NE   | NE   |
| <u>March – August 2023</u>                               |       |              |              |      |      |
| <b>Hospitalisation due to COVID-19</b>                   |       |              |              |      |      |
| No bivalent booster                                      | 467   | 209017       |              |      |      |
| <i>BA.1 bivalent booster</i>                             |       |              |              |      |      |
| 0–13                                                     | 0     | 32           | NE           | NE   | NE   |
| 14–60                                                    | ND    | 622          | 0.51         | 0.07 | 3.61 |



(Supplementary Table S6 continued)

| Days since bivalent booster                              | Cases | Person-years | MLE  | LCI  | UCI   |
|----------------------------------------------------------|-------|--------------|------|------|-------|
| 61–120                                                   | 12    | 10116        | 0.37 | 0.20 | 0.66  |
| 121–180                                                  | 122   | 29684        | 0.84 | 0.67 | 1.06  |
| 181–240                                                  | 78    | 30496        | 0.95 | 0.72 | 1.24  |
| 241–300                                                  | 21    | 22346        | 1.14 | 0.70 | 1.87  |
| <i>BA.4-5 bivalent booster</i>                           |       |              |      |      |       |
| 0–13                                                     | 0     | 336          | NE   | NE   | NE    |
| 14–60                                                    | ND    | 3484         | 0.70 | 0.33 | 1.48  |
| 61–120                                                   | 48    | 27576        | 0.59 | 0.43 | 0.82  |
| 121–180                                                  | 269   | 70618        | 0.93 | 0.77 | 1.12  |
| 181–240                                                  | 133   | 68538        | 0.90 | 0.71 | 1.13  |
| 241–300                                                  | 31    | 47483        | 0.99 | 0.63 | 1.55  |
| <i>BA.1 and BA.4-5 bivalent boosters</i>                 |       |              |      |      |       |
| 301–364                                                  | ND    | 4233         | 0.78 | 0.18 | 3.32  |
| <b>Death due to COVID-19</b>                             |       |              |      |      |       |
| No bivalent booster                                      | 170   | 209091       |      |      |       |
| <i>BA.1 bivalent booster</i>                             |       |              |      |      |       |
| 0–13                                                     | 0     | 32           | NE   | NE   | NE    |
| 14–60                                                    | 0     | 622          | NE   | NE   | NE    |
| 61–120                                                   | 7     | 10117        | 0.63 | 0.28 | 1.39  |
| 121–180                                                  | 42    | 29695        | 0.82 | 0.56 | 1.20  |
| 181–240                                                  | 42    | 30514        | 1.16 | 0.79 | 1.70  |
| 241–300                                                  | 14    | 22351        | 1.64 | 0.87 | 3.08  |
| <i>BA.4-5 bivalent booster</i>                           |       |              |      |      |       |
| 0–13                                                     | 0     | 336          | NE   | NE   | NE    |
| 14–60                                                    | ND    | 3485         | 0.81 | 0.25 | 2.56  |
| 61–120                                                   | 10    | 27582        | 0.34 | 0.17 | 0.66  |
| 121–180                                                  | 95    | 70645        | 0.82 | 0.60 | 1.10  |
| 181–240                                                  | 63    | 68571        | 0.80 | 0.57 | 1.13  |
| 241–300                                                  | 19    | 47492        | 1.11 | 0.62 | 2.02  |
| <i>BA.1 and BA.4-5 bivalent boosters</i>                 |       |              |      |      |       |
| 301–364                                                  | ND    | 4234         | 1.44 | 0.41 | 5.10  |
| <b>Death in which COVID-19 was a contributing factor</b> |       |              |      |      |       |
| No bivalent booster                                      | 122   | 209091       |      |      |       |
| <i>BA.1 bivalent booster</i>                             |       |              |      |      |       |
| 0–13                                                     | 0     | 32           | NE   | NE   | NE    |
| 14–60                                                    | 0     | 622          | NE   | NE   | NE    |
| 61–120                                                   | 1–4   | 10117        | 0.30 | 0.07 | 1.26  |
| 121–180                                                  | 24    | 29695        | 0.74 | 0.46 | 1.21  |
| 181–240                                                  | 25    | 30514        | 0.92 | 0.57 | 1.49  |
| 241–300                                                  | 7     | 22351        | 1.10 | 0.48 | 2.55  |
| <i>BA.4-5 bivalent booster</i>                           |       |              |      |      |       |
| 0–13                                                     | 0     | 336          | NE   | NE   | NE    |
| 14–60                                                    | ND    | 3485         | 1.33 | 0.41 | 4.24  |
| 61–120                                                   | 5–8   | 27582        | 0.41 | 0.18 | 0.91  |
| 121–180                                                  | 82    | 70645        | 1.17 | 0.82 | 1.65  |
| 181–240                                                  | 40    | 68571        | 0.70 | 0.46 | 1.06  |
| 241–300                                                  | 16    | 47492        | 1.32 | 0.69 | 2.52  |
| <i>BA.1 and BA.4-5 bivalent boosters</i>                 |       |              |      |      |       |
| 301–364                                                  | ND    | 4234         | 2.07 | 0.26 | 16.59 |

(Supplementary Table S6 continued)

| Days since bivalent booster | Cases | Person-years | MLE | LCI | UCI |
|-----------------------------|-------|--------------|-----|-----|-----|
|-----------------------------|-------|--------------|-----|-----|-----|

MLE, maximum likelihood estimate;

LCI/UCI, lower/upper limit of the 95% Wald confidence interval;

ND, not disclosed;

NE, not estimated

Case counts between 1 and 4 are reported as 1–4. If a count in Supplementary Table S5 is masked, the corresponding counts in the present table (Supplementary Table S6) are not disclosed.

**Supplementary Table S7: Hazard ratios, 65-to-79-year-olds** Covariate-adjusted hazard ratios comparing the hazards of severe COVID-19 outcomes in 65-to-79-year-olds who received a bivalent booster with the corresponding hazards in those who did not receive a bivalent booster.

| Days since bivalent booster                              | Cases | Person-years | Hazard ratio |      |       |
|----------------------------------------------------------|-------|--------------|--------------|------|-------|
|                                                          |       |              | MLE          | LCI  | UCI   |
| <u>September 2022 – February 2023</u>                    |       |              |              |      |       |
| <b>Hospitalisation due to COVID-19</b>                   |       |              |              |      |       |
| No bivalent booster                                      | 696   | 212717       |              |      |       |
| 0–13                                                     | 24    | 17653        | 0.40         | 0.26 | 0.62  |
| 14–60                                                    | 105   | 56866        | 0.64         | 0.49 | 0.83  |
| 61–120                                                   | 48    | 47684        | 0.83         | 0.57 | 1.20  |
| 121–180                                                  | 1–4   | 2182         | 1.48         | 0.45 | 4.85  |
| <b>Death due to COVID-19</b>                             |       |              |              |      |       |
| No bivalent booster                                      | 217   | 212826       |              |      |       |
| 0–13                                                     | ND    | 17654        | 0.36         | 0.16 | 0.80  |
| 14–60                                                    | 24    | 56877        | 0.46         | 0.28 | 0.75  |
| 61–120                                                   | 10    | 47697        | 0.48         | 0.23 | 0.99  |
| 121–180                                                  | 0     | 2183         | NE           | NE   | NE    |
| <b>Death in which COVID-19 was a contributing factor</b> |       |              |              |      |       |
| No bivalent booster                                      | 208   | 212826       |              |      |       |
| 0–13                                                     | ND    | 17654        | 0.11         | 0.03 | 0.47  |
| 14–60                                                    | 24    | 56877        | 0.44         | 0.27 | 0.74  |
| 61–120                                                   | 12    | 47697        | 0.47         | 0.24 | 0.93  |
| 121–180                                                  | ND    | 2183         | 1.07         | 0.14 | 8.38  |
| <u>March – August 2023</u>                               |       |              |              |      |       |
| <b>Hospitalisation due to COVID-19</b>                   |       |              |              |      |       |
| No bivalent booster                                      | 267   | 165026       |              |      |       |
| 0–13                                                     | 0     | 286          | NE           | NE   | NE    |
| 14–60                                                    | ND    | 3254         | 0.59         | 0.22 | 1.61  |
| 61–120                                                   | 30    | 28461        | 0.51         | 0.33 | 0.76  |
| 121–180                                                  | 204   | 72878        | 0.97         | 0.76 | 1.23  |
| 181–240                                                  | 114   | 72005        | 0.95         | 0.72 | 1.26  |
| 241–300                                                  | 27    | 50041        | 0.96         | 0.58 | 1.59  |
| 301–364                                                  | ND    | 3020         | 1.44         | 0.33 | 6.33  |
| <b>Death due to COVID-19</b>                             |       |              |              |      |       |
| No bivalent booster                                      | 57    | 165068       |              |      |       |
| 0–13                                                     | 0     | 286          | NE           | NE   | NE    |
| 14–60                                                    | ND    | 3254         | 0.75         | 0.10 | 5.58  |
| 61–120                                                   | 1–4   | 28466        | 0.35         | 0.12 | 1.02  |
| 121–180                                                  | 39    | 72897        | 0.87         | 0.52 | 1.44  |
| 181–240                                                  | 27    | 72033        | 0.80         | 0.46 | 1.41  |
| 241–300                                                  | 13    | 50049        | 2.00         | 0.87 | 4.61  |
| 301–364                                                  | ND    | 3021         | 1.96         | 0.22 | 17.53 |
| <b>Death in which COVID-19 was a contributing factor</b> |       |              |              |      |       |
| No bivalent booster                                      | 45    | 165068       |              |      |       |
| 0–13                                                     | 0     | 286          | NE           | NE   | NE    |
| 14–60                                                    | ND    | 3254         | 1.95         | 0.45 | 8.42  |
| 61–120                                                   | 1–4   | 28466        | 0.35         | 0.10 | 1.20  |
| 121–180                                                  | 37    | 72897        | 1.22         | 0.70 | 2.13  |
| 181–240                                                  | 16    | 72033        | 0.65         | 0.33 | 1.28  |

(Supplementary Table S7 continued)

| Days since bivalent booster | Cases | Person-years | MLE  | LCI  | UCI  |
|-----------------------------|-------|--------------|------|------|------|
| 241–300                     | 5     | 50049        | 0.80 | 0.26 | 2.47 |
| 301–364                     | 0     | 3021         | NE   | NE   | NE   |

MLE, maximum likelihood estimate;

LCI/UCI, lower/upper limit of the 95% Wald confidence interval;

ND, not disclosed;

NE, not estimated

Case counts between 1 and 4 are reported as 1–4. If a count in Supplementary Table S5 is masked, the corresponding counts in the present table (Supplementary Table S7) are not disclosed.

**Supplementary Table S8: Hazard ratios, 80-to-110-year-olds** Covariate-adjusted hazard ratios comparing the hazards of severe COVID-19 outcomes in 80-to-110-year-olds who received a bivalent booster with the corresponding hazards in those who did not receive a bivalent booster.

| Days since bivalent booster                              | Cases | Person-years | Hazard ratio |      |      |
|----------------------------------------------------------|-------|--------------|--------------|------|------|
|                                                          |       |              | MLE          | LCI  | UCI  |
| <u>September 2022 – February 2023</u>                    |       |              |              |      |      |
| <b>Hospitalisation due to COVID-19</b>                   |       |              |              |      |      |
| No bivalent booster                                      | 903   | 86411        |              |      |      |
| 0–13                                                     | 45    | 6972         | 0.47         | 0.33 | 0.67 |
| 14–60                                                    | 80    | 22644        | 0.33         | 0.24 | 0.43 |
| 61–120                                                   | 40    | 20020        | 0.63         | 0.43 | 0.94 |
| 121–180                                                  | 1–4   | 908          | 1.47         | 0.34 | 6.37 |
| <b>Death due to COVID-19</b>                             |       |              |              |      |      |
| No bivalent booster                                      | 756   | 86539        |              |      |      |
| 0–13                                                     | ND    | 6973         | 0.14         | 0.07 | 0.28 |
| 14–60                                                    | 85    | 22655        | 0.50         | 0.38 | 0.66 |
| 61–120                                                   | 48    | 20030        | 0.80         | 0.56 | 1.14 |
| 121–180                                                  | ND    | 909          | 0.57         | 0.08 | 4.30 |
| <b>Death in which COVID-19 was a contributing factor</b> |       |              |              |      |      |
| No bivalent booster                                      | 606   | 86539        |              |      |      |
| 0–13                                                     | ND    | 6973         | 0.10         | 0.05 | 0.23 |
| 14–60                                                    | 74    | 22655        | 0.38         | 0.29 | 0.51 |
| 61–120                                                   | 44    | 20030        | 0.60         | 0.42 | 0.87 |
| 121–180                                                  | ND    | 909          | 0.57         | 0.07 | 4.28 |
| <u>March – August 2023</u>                               |       |              |              |      |      |
| <b>Hospitalisation due to COVID-19</b>                   |       |              |              |      |      |
| No bivalent booster                                      | 200   | 43992        |              |      |      |
| 0–13                                                     | 0     | 82           | NE           | NE   | NE   |
| 14–60                                                    | ND    | 853          | 0.76         | 0.28 | 2.07 |
| 61–120                                                   | 30    | 9231         | 0.56         | 0.37 | 0.86 |
| 121–180                                                  | 187   | 27425        | 0.83         | 0.64 | 1.07 |
| 181–240                                                  | 97    | 27029        | 0.88         | 0.65 | 1.21 |
| 241–300                                                  | 25    | 19787        | 1.26         | 0.70 | 2.26 |
| 301–364                                                  | 0     | 1213         | NE           | NE   | NE   |
| <b>Death due to COVID-19</b>                             |       |              |              |      |      |
| No bivalent booster                                      | 113   | 44023        |              |      |      |
| 0–13                                                     | 0     | 82           | NE           | NE   | NE   |
| 14–60                                                    | ND    | 853          | 0.68         | 0.17 | 2.81 |
| 61–120                                                   | 13    | 9234         | 0.44         | 0.24 | 0.83 |
| 121–180                                                  | 98    | 27442        | 0.79         | 0.56 | 1.11 |
| 181–240                                                  | 78    | 27052        | 0.97         | 0.67 | 1.39 |
| 241–300                                                  | 20    | 19794        | 1.03         | 0.55 | 1.95 |
| 301–364                                                  | ND    | 1214         | 1.28         | 0.27 | 5.99 |
| <b>Death in which COVID-19 was a contributing factor</b> |       |              |              |      |      |
| No bivalent booster                                      | 77    | 44023        |              |      |      |
| 0–13                                                     | 0     | 82           | NE           | NE   | NE   |
| 14–60                                                    | ND    | 853          | 0.62         | 0.09 | 4.57 |
| 61–120                                                   | 6     | 9234         | 0.41         | 0.17 | 1.00 |
| 121–180                                                  | 69    | 27442        | 0.95         | 0.63 | 1.43 |
| 181–240                                                  | 49    | 27052        | 0.81         | 0.52 | 1.26 |

(Supplementary Table S8 continued)

| Days since bivalent booster | Cases | Person-years | MLE  | LCI  | UCI   |
|-----------------------------|-------|--------------|------|------|-------|
| 241–300                     | 18    | 19794        | 1.43 | 0.72 | 2.84  |
| 301–364                     | ND    | 1214         | 3.62 | 0.41 | 31.93 |

MLE, maximum likelihood estimate;

LCI/UCI, lower/upper limit of the 95% Wald confidence interval;

ND, not disclosed;

NE, not estimated

Case counts between 1 and 4 are reported as 1–4. If a count in Supplementary Table S5 is masked, the corresponding counts in the present table (Supplementary Table S8) are not disclosed.

**Supplementary Figure S1: Distribution of sequenced Omicron lineages in Finland** The graph shows the percentages of the most frequent SARS-CoV-2 sublineages detected by sentinel surveillance and recorded in the National Infectious Diseases Register by week of sample collection since end of September 2022. Green bars represent BA.2 sublineages (BA.2 lineages and CH.1.1.X), orange bars represent BA.4 sublineages and pink bars represent BA.5 sublineages (BA.5 lineages and BQ.1.X). The greyscale bars represent recombinant lineages (XBB lineages and EG.5.X) as well as the group ‘Other variants’, which comprises all sublineages not assigned to any of the previous groups. The .X extension covers the whole sublineage family, e.g. BQ.1.X covers all descendants of BQ.1, such as BQ.1.1 and BQ.1.2.

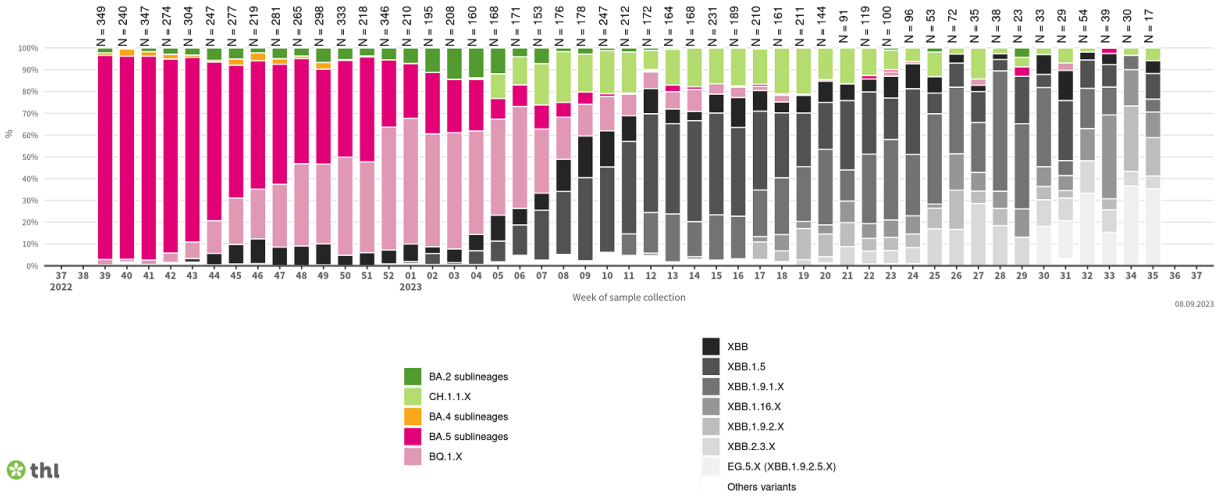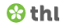

Adapted from <https://thl.fi/en/web/infectious-diseases-and-vaccinations/what-s-new/coronavirus-covid-19-latest-updates/coronavirus-variants/genomic-surveillance-of-sars-cov-2>

**Supplementary Figure S2: Distribution of deaths due to COVID-19 in Finland** The graph shows the weekly number of deaths due to COVID-19 and deaths in which COVID-19 was a contributing factor in Finland.

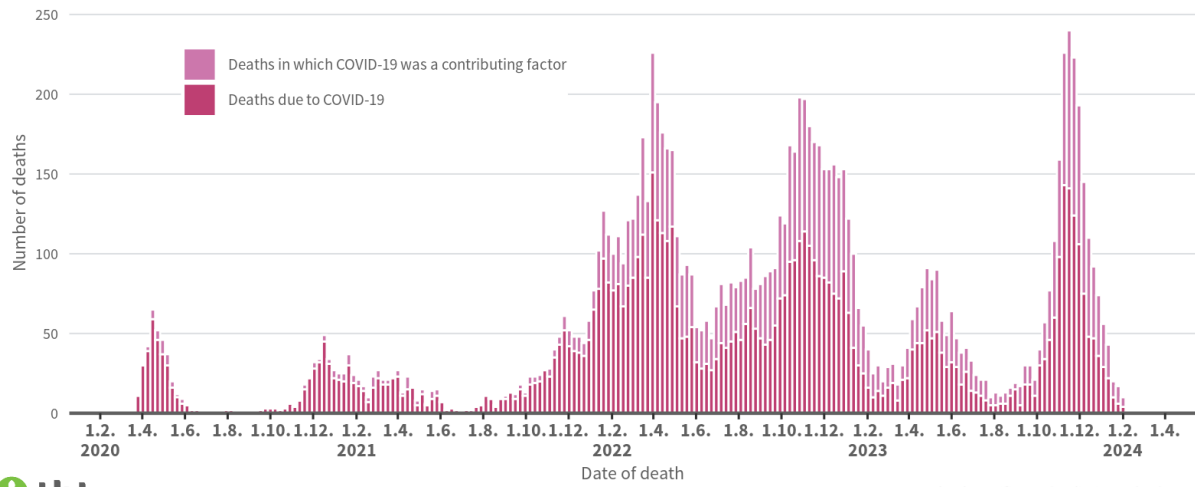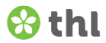

Source: death certificates (preliminary data), THL

Adapted from <https://www.thl.fi/episeuranta/tautitapaukset/coronamap.html>
